# Supplementary material
Source: PubMed Central journal article supplement (PMC6335154)
Supplement: NIHMS1512591-supplement-4.pdf [file NIHMS1512591-supplement-4.pdf]

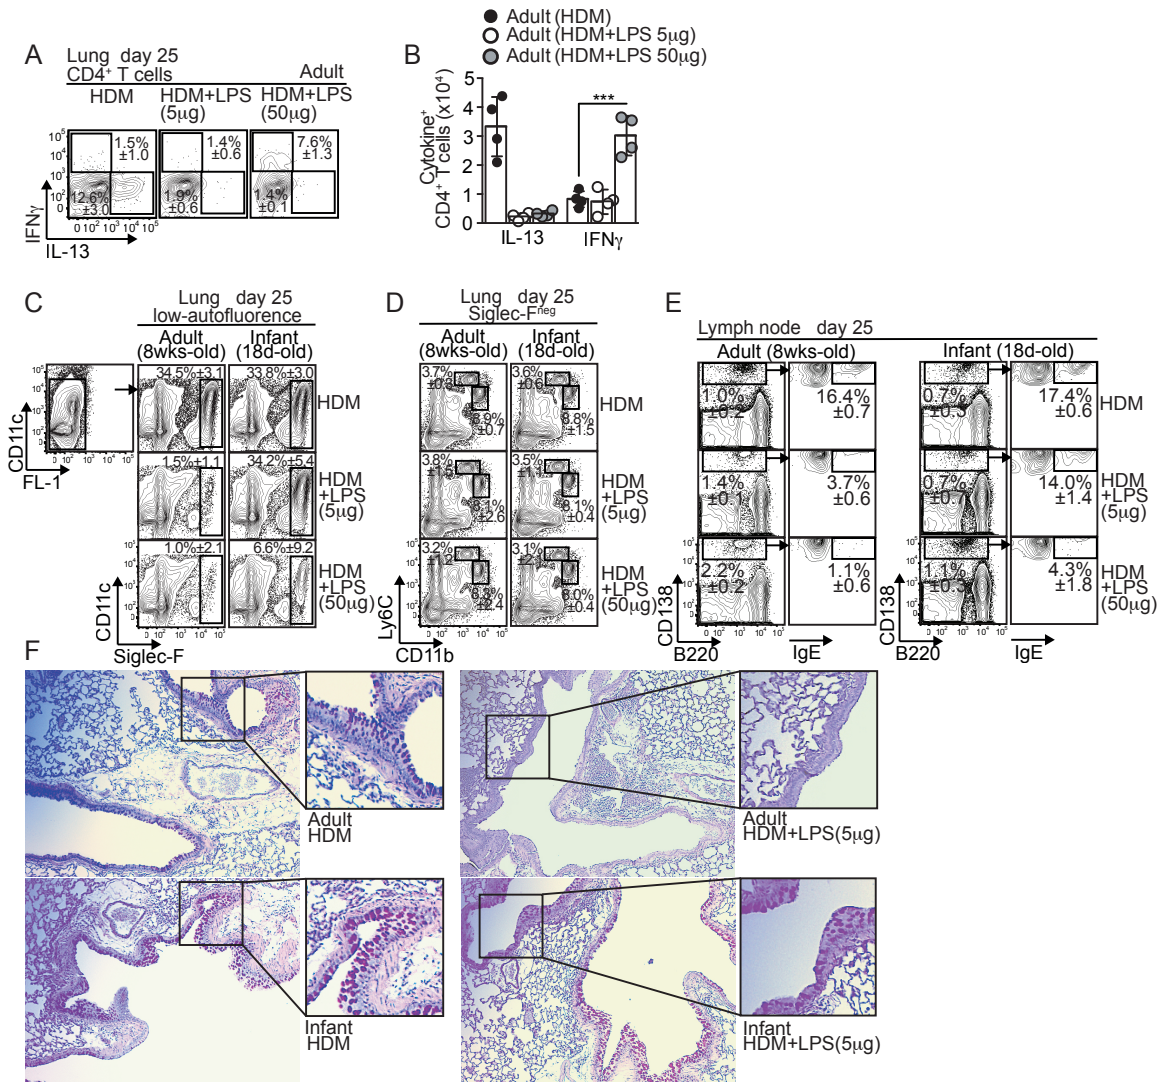

**Figure S1. Related to Figure 1. Low-dose LPS sensitization in 18d-old infants does not prevent HDM-induced asthma features in adult life.** B6 adult and 18d-old infant mice were i.n treated with 50μg of HDM plus different concentrations of LPS for 3 consecutive days starting on day 1. On day 20, mice were i.n challenged with 50μg of HDM daily for 3 days and analyzed on day 25. **(A-B)** Frequencies **(A)** and numbers **(B)** of IL-13- and IFN $\gamma$ -expressing CD4<sup>+</sup> T cells in the lungs determined by ICS after restimulation for 4 h. **(C-D)** Frequencies of eosinophils (autofluorescence<sup>lo</sup> CD11c<sup>lo</sup> Siglec-F<sup>+</sup>) **(C)**, neutrophils (Siglec-F<sup>+</sup>CD11b<sup>hi</sup>Ly6C<sup>int</sup>) and monocytes (Siglec-F<sup>+</sup>CD11b<sup>int</sup>Ly6C<sup>hi</sup>) **(D)** in the lungs. **(E)** Frequencies of IgE<sup>+</sup> ACS in the mLN. **(F)** Lung sections stained with Periodic Acid-Schiff (PAS) to identify goblet cells. \*P < 0.05 \*\*P < 0.01 \*\*\*P < 0.001 (unpaired Student's t test). Data are representative of at least two independent experiments (mean and S.D. of 4-5 mice per group).

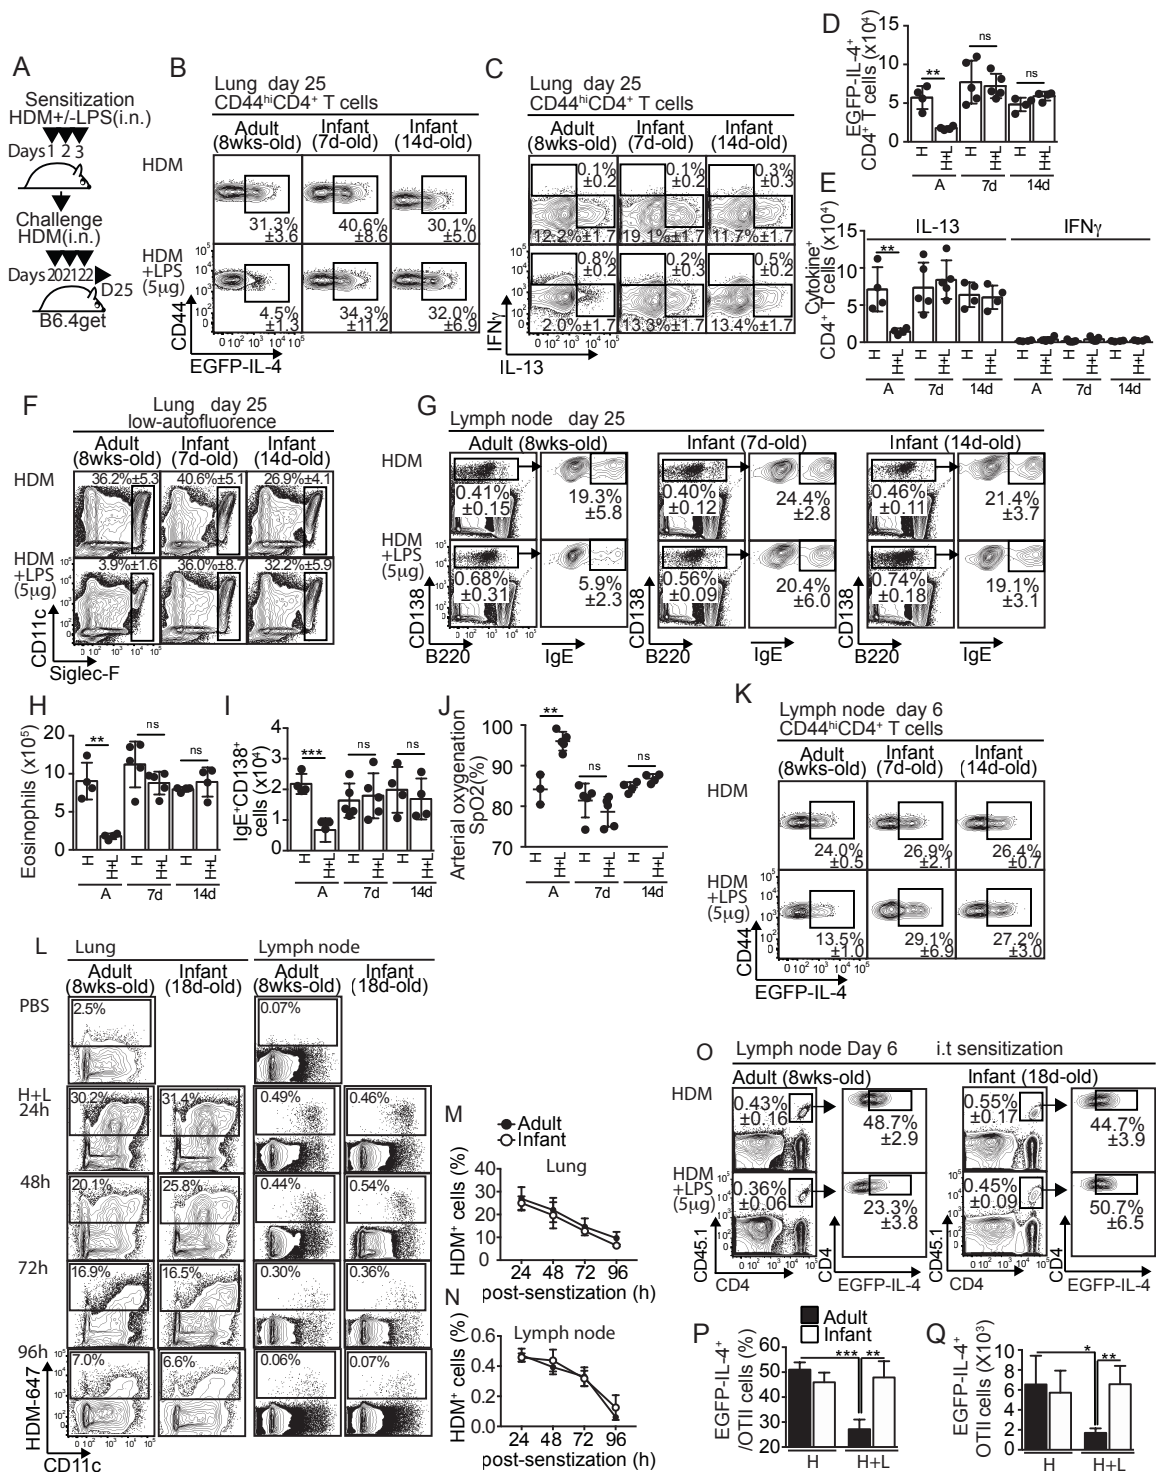

**Figure S2. Related to Figure 1. Low-dose LPS sensitization in 7 to 18d-old infants does not prevent HDM-induced Th2 priming and development of Th2 cell-mediated asthmatic features later in life. (A-J)** B6.4get adults, 7d-old neonates and 14d-old infants were i.n treated with 50µg of HDM+/-5µg of LPS for 3 consecutive days starting on day 1. On day 20, mice were i.n challenged with 50µg of HDM daily for 3 days and analyzed on day 25. Frequencies (B-C) and numbers (D-E) of IL-4-expressing (EGFP<sup>+</sup>) CD4<sup>+</sup> T cells (B, D) and IL-13- and IFN $\gamma$ -expressing CD4<sup>+</sup> T cells (C, E) in the lungs. Frequencies (F) and numbers (H) of eosinophils in the lungs. Frequencies (G) and numbers (I) of IgE<sup>+</sup> ACS in the mLN. SpO<sub>2</sub> as determined by pulse-oximetry (J). (K) B6.4get adults, 7d-old neonates and 14d-old infants were i.n treated with 50µg of HDM+/-5µg of LPS for 3 consecutive days starting on day 1 and analyzed on day 6. Frequencies of IL-4-expressing (EGFP<sup>+</sup>) CD4<sup>+</sup> T cells in the mLN. (L-N) B6 adult and 18d-old infant mice were i.n treated with Alexa Fluor 647-labeled HDM+5µg of LPS on day 1 and analyzed at different time points. Frequencies of HDM-bearing cells in the lungs (L-M) and mLNs (L, N). (O-Q) Adult and 18d-old infant naïve B6 mice were adoptively transferred with 25x10<sup>3</sup> CD45.1<sup>+</sup> OTII.4get cells at day 0, i.t treated with 50µg of HDM+5µg of OVA+/-5µg of LPS for 3 consecutive days starting on day 1 and analyzed by flow cytometry on day 6. Frequencies (O-P) and numbers (Q) of donor IL-4-expressing (EGFP<sup>+</sup>) OTII T cells in the mLN of recipient mice. \*P < 0.05 \*\*P < 0.01 \*\*\*P < 0.001 (unpaired Student's t test). Data are representative of two independent experiments (mean and S.D. of 3-5 mice per group).

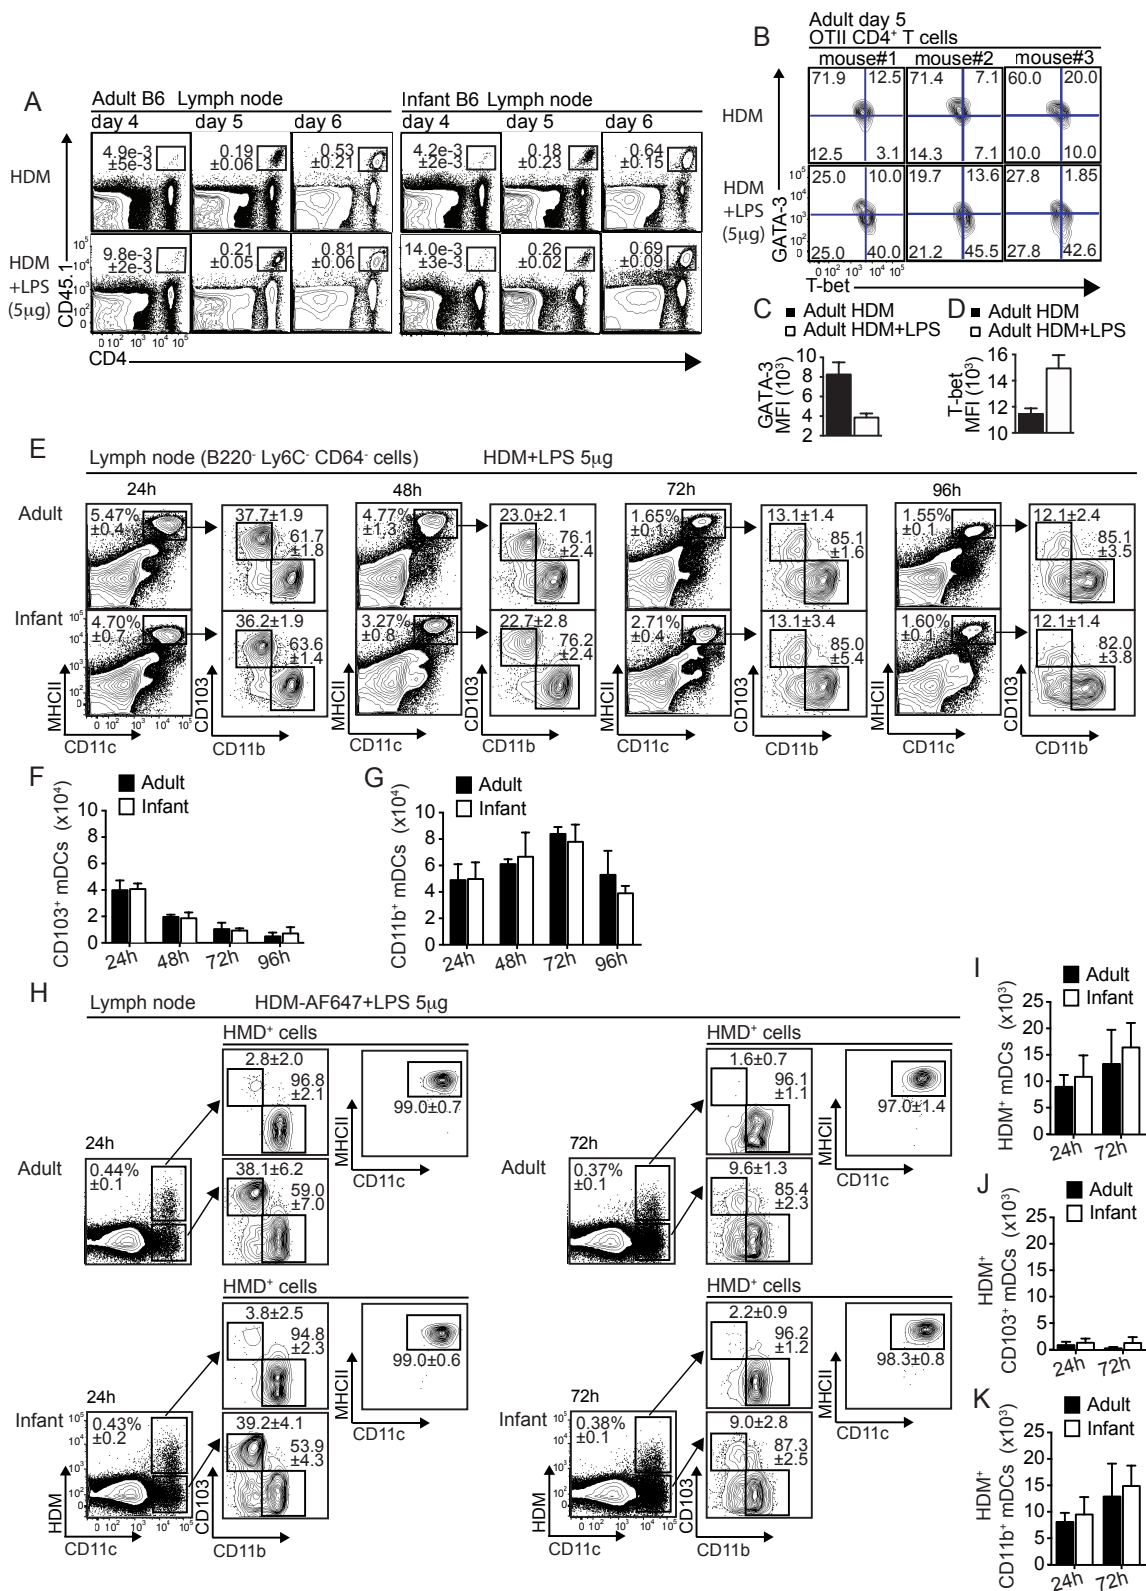

**Figure S3. Related to Figure 2. Kinetic analysis of specific CD4<sup>+</sup> T cells and mDCs in the mLN after low-dose LPS sensitization.** (A-D) Adult and 18d-old infant naïve B6 mice were adoptively transferred with  $25 \times 10^3$  CD45.1<sup>+</sup> OTII.4get cells at day 0, i.n treated with  $50 \mu\text{g}$  of HDM+ $5 \mu\text{g}$  of OVA+/- $5 \mu\text{g}$  of LPS for 3 consecutive days starting on day 1 and analyzed by flow cytometry on days 4, 5 and 6. Frequencies of donor OTII T cells (A) and frequencies of GATA-3 and T-bet-expressing cells (B), MFI of GATA-3 expression (C) and MFI of T-bet expression (D) in donor OTII T cells from mLN of recipient mice. (E-K) B6 adult and 18d-old infant mice were i.n treated with HDM+/- $5 \mu\text{g}$  of LPS (E-G) or with Alexa Fluor 647-labeled HDM+/- $5 \mu\text{g}$  of LPS (H-K) for 3 consecutive days and analyzed at different time points. Frequencies and numbers of CD103<sup>+</sup> mDCs (E-F), CD11b<sup>+</sup> mDCs (E,G), HDM-bearing mDCs (H-I), HDM-bearing CD103<sup>+</sup> mDCs (H,J) and HDM-bearing CD11b<sup>+</sup> mDCs (H,K). Data are representative of three independent experiments (mean  $\pm$  SD of 4 mice per time point).



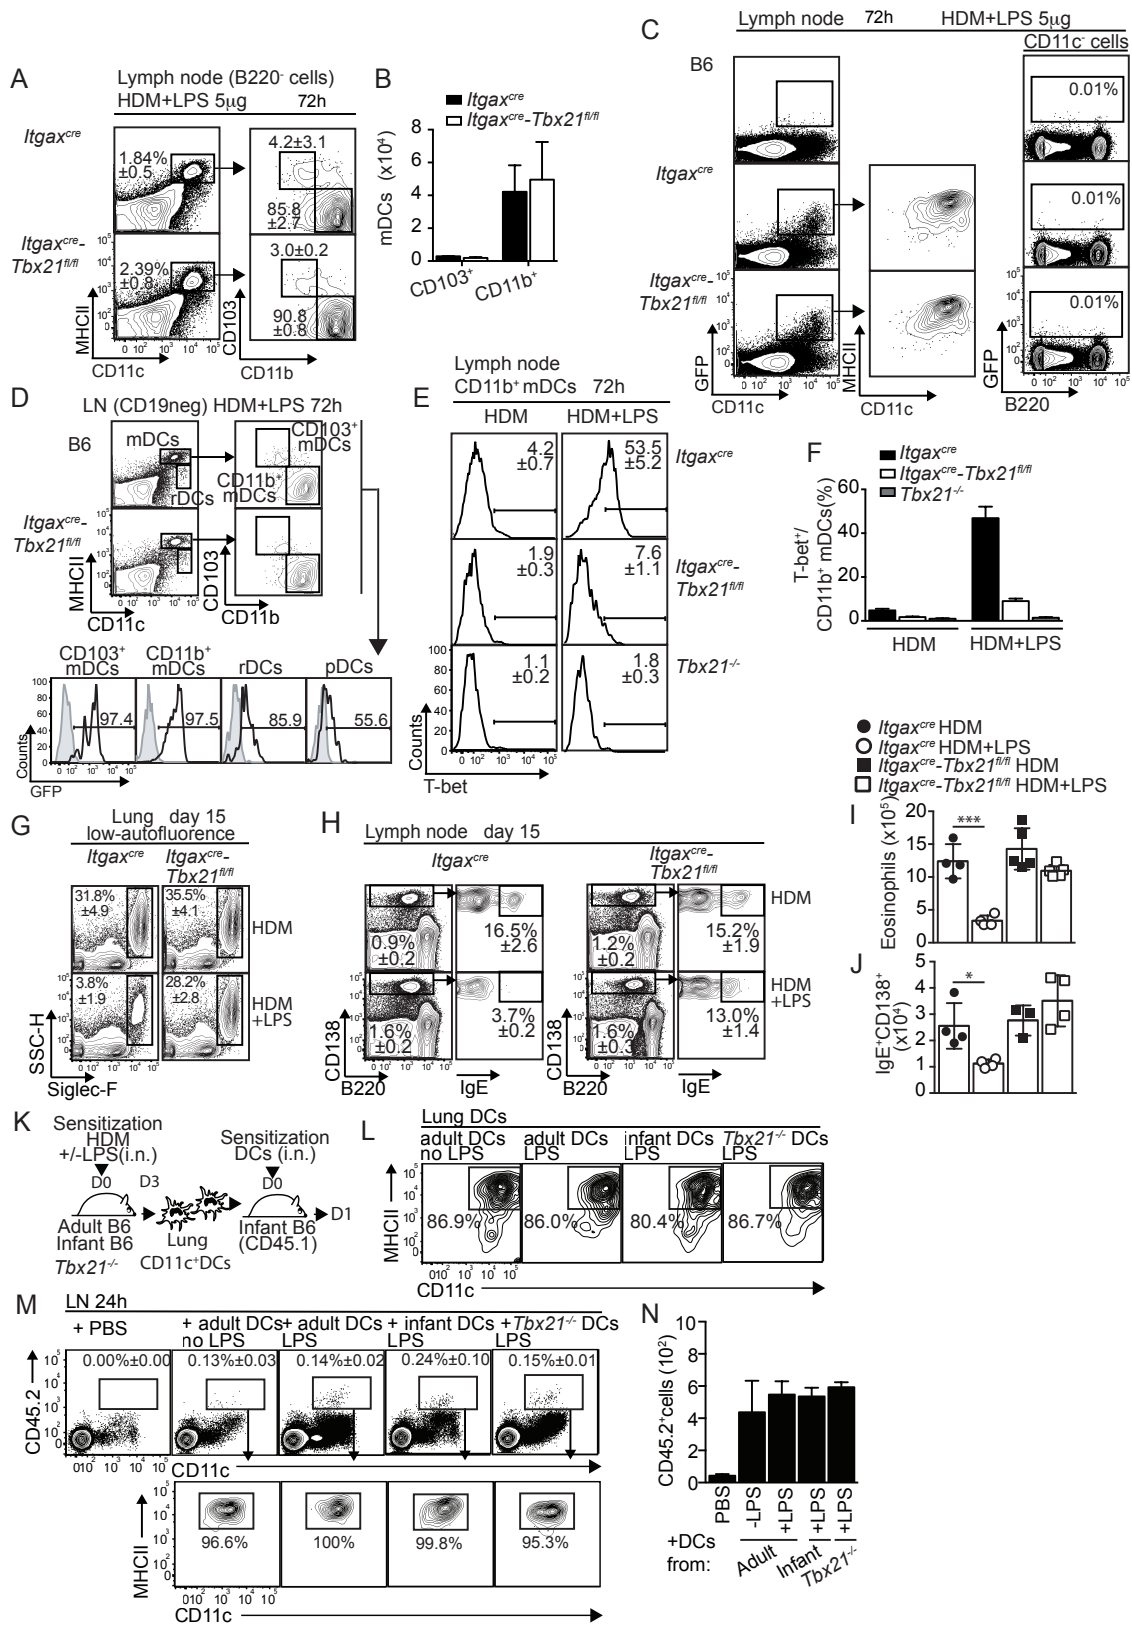



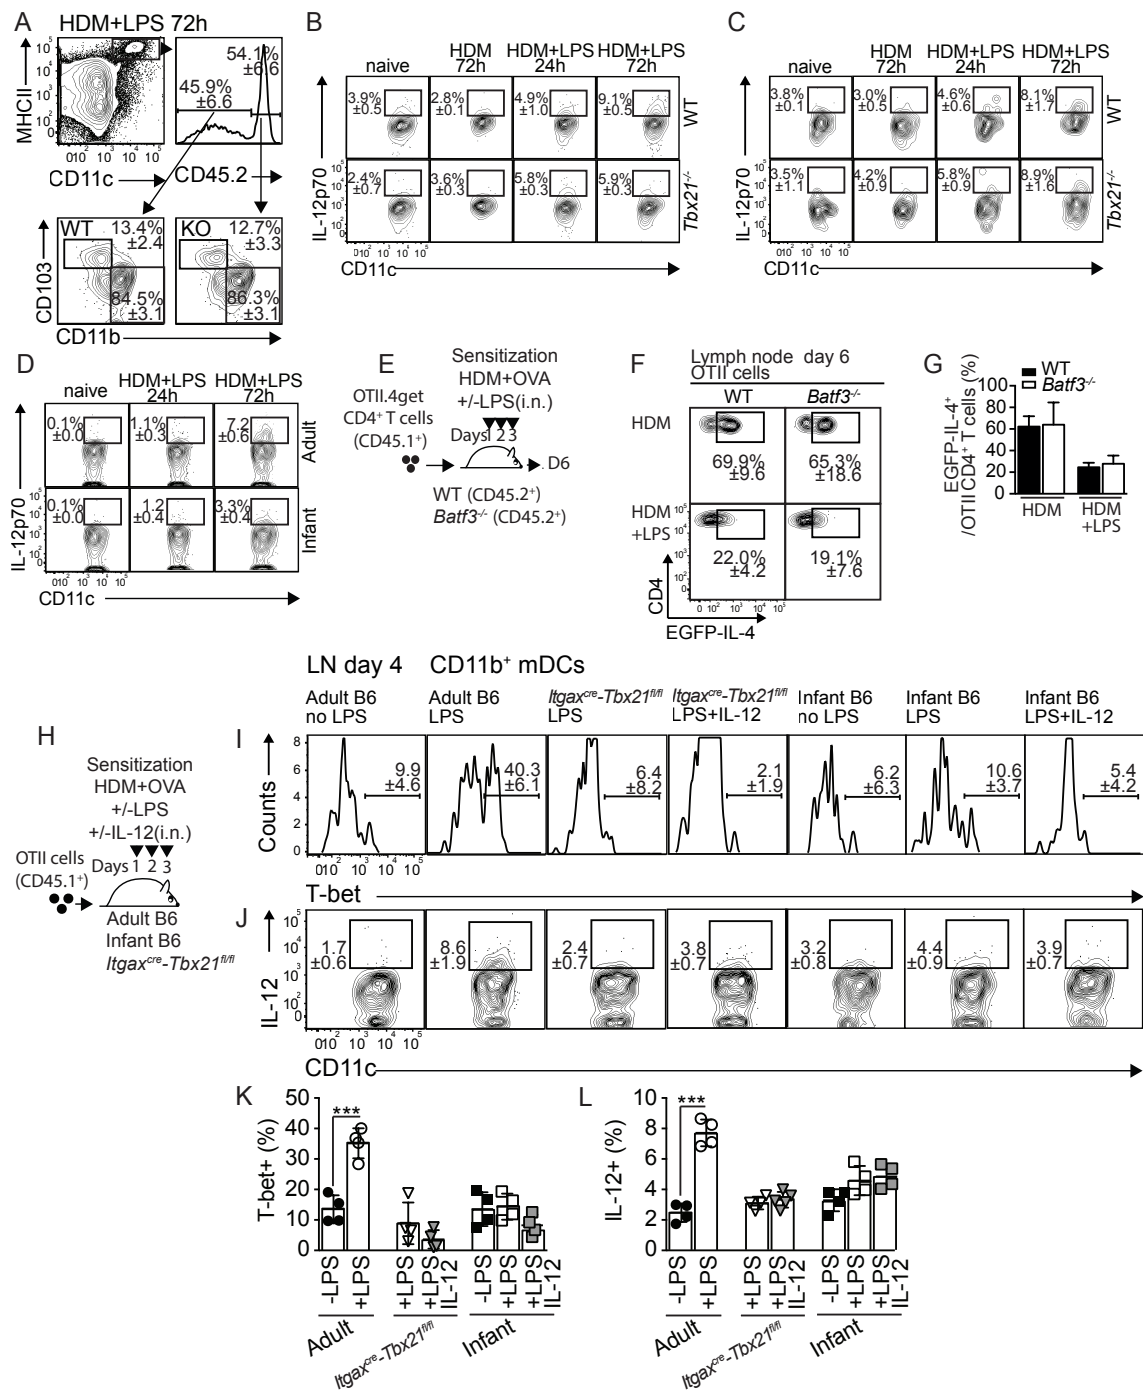

**Figure S5. Related to Figure 5. *Tbx21*<sup>-/-</sup> and infant CD11b<sup>+</sup> mDCs are intrinsically impaired in their ability to produce IL-12 after low-dose LPS exposure.** (A-C) B6 (CD45.1<sup>+</sup>) mice were irradiated and reconstituted with 1:1 mixture of BM from B6 (CD45.1<sup>+</sup>) and *Tbx21*<sup>-/-</sup> (CD45.2<sup>+</sup>) donors. Frequency of WT and *Tbx21*<sup>-/-</sup> CD11b<sup>+</sup> and CD103<sup>+</sup> mDCs in the mLN of day 3-HDM+LPS-treated reconstituted chimeric mice (A). Frequencies of IL-12p70-expressing WT and *Tbx21*<sup>-/-</sup> CD11b<sup>+</sup> mDCs (B) and CD103<sup>+</sup> mDCs (C) in the mLN of HDM+/-LPS-treated reconstituted chimeric mice. (D) Frequency of IL-12p70-expressing CD11b<sup>+</sup> mDCs in the mLN of HDM+/-LPS-treated adult and infant B6 mice. (E-G) *Batf3*<sup>-/-</sup> and control mice were adoptively transferred with 25x10<sup>3</sup> CD45.1<sup>+</sup> OTII.4get cells at day 0 and i.n treated with 50μg of HDM+5μg of OVA+/-5μg of LPS for 3 consecutive days starting on day 1 (E). Frequencies of IL-4-expressing (EGFP<sup>+</sup>) cells in donor OTII T cells from the mLN on day 6 (F-G). (H-L) Adult and 18d-old infant B6 mice or *Itgax*<sup>cre</sup>-*Tbx21*<sup>fl/fl</sup> mice were i.n treated with 50μg of HDM+5μg of OVA+/-5μg of LPS+/-150ng of rIL-12p70 for 3 consecutive days starting on day 1 (H). Frequencies of T-bet (I,K) and IL-12p70 (J,L) expression in CD11b<sup>+</sup> mDCs from mLN on day 4. \*\*\*\*P < 0.001 (unpaired Student's t test). Data are representative of two independent experiments (mean and S.D. of 3-4 mice per group).

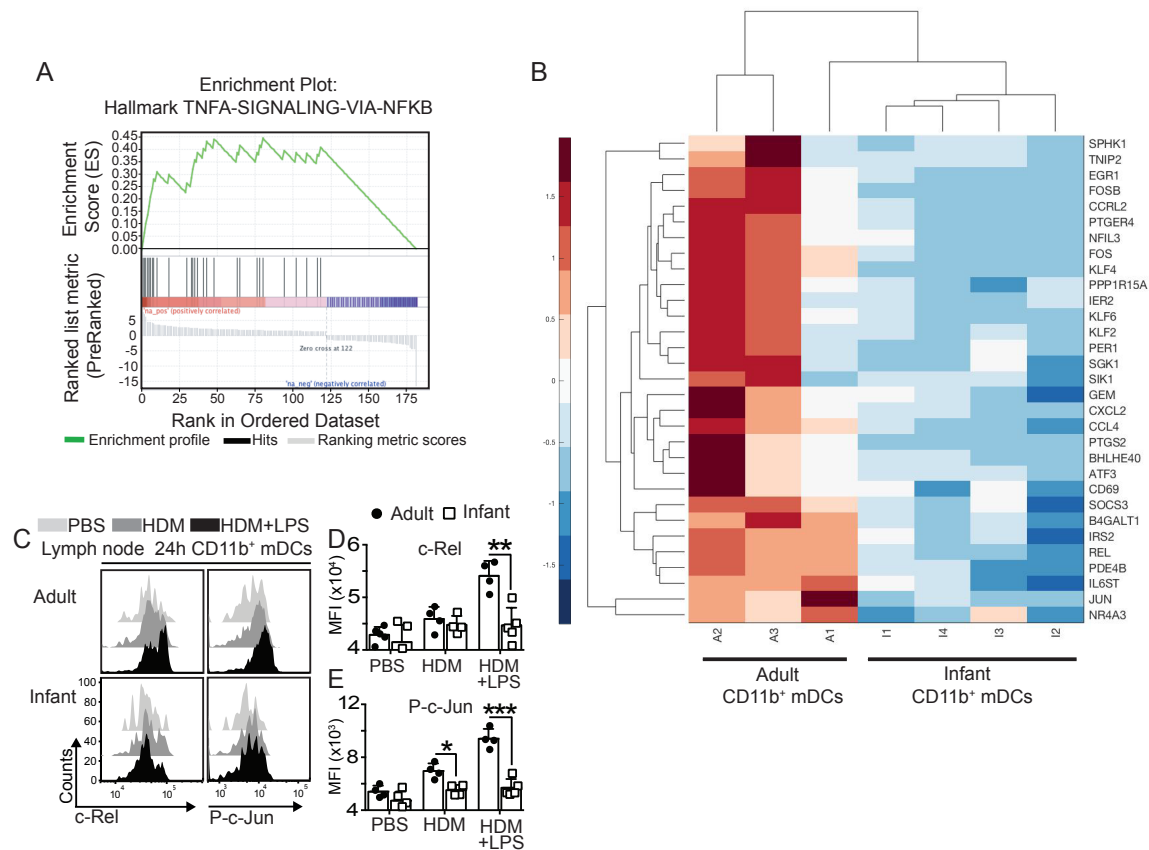

**Figure S6. Related to Figure 6. TNF $\alpha$ -via NF $\kappa$ B hallmark-signaling pathway was the most significantly down-regulated pathway in infant CD11b<sup>+</sup> mDCs after low-dose LPS sensitization. (A-B)** CD11b<sup>+</sup> mDCs were sorted from the mLN of adult and 18d-old infant mice 24 after HDM+LPS<sup>0</sup> sensitization and RNA-seq was performed. **(A)** GSEA showing enrichment in the TNF- $\alpha$  via NF $\kappa$ B hallmark-signaling pathway in adults vs. infant CD11b<sup>+</sup> DCs (adjusted p-value <0.05). **(B)** Heat map displaying the expression of the TNF $\alpha$ -via NF $\kappa$ B hallmark signaling pathway genes that are differentially expressed in adult CD11b<sup>+</sup> mDCs relative to infant CD11b<sup>+</sup> mDCs. Replicates for each cell type were obtained from three or four independent experiments. **(C-E)** B6 adult and 18d-old infant mice were i.n treated with HDM+/-5 $\mu$ g of LPS. Expression c-Rel **(C,D)** and P-c-Jun **(C,E)** in CD11b<sup>+</sup> mDCs from the mLN on day 1. \*P < 0.05 \*\*P < 0.01 \*\*\*P < 0.001 (unpaired Student's t test). Data are representative of two independent experiments (mean and S.D. of 4-5 mice per group).

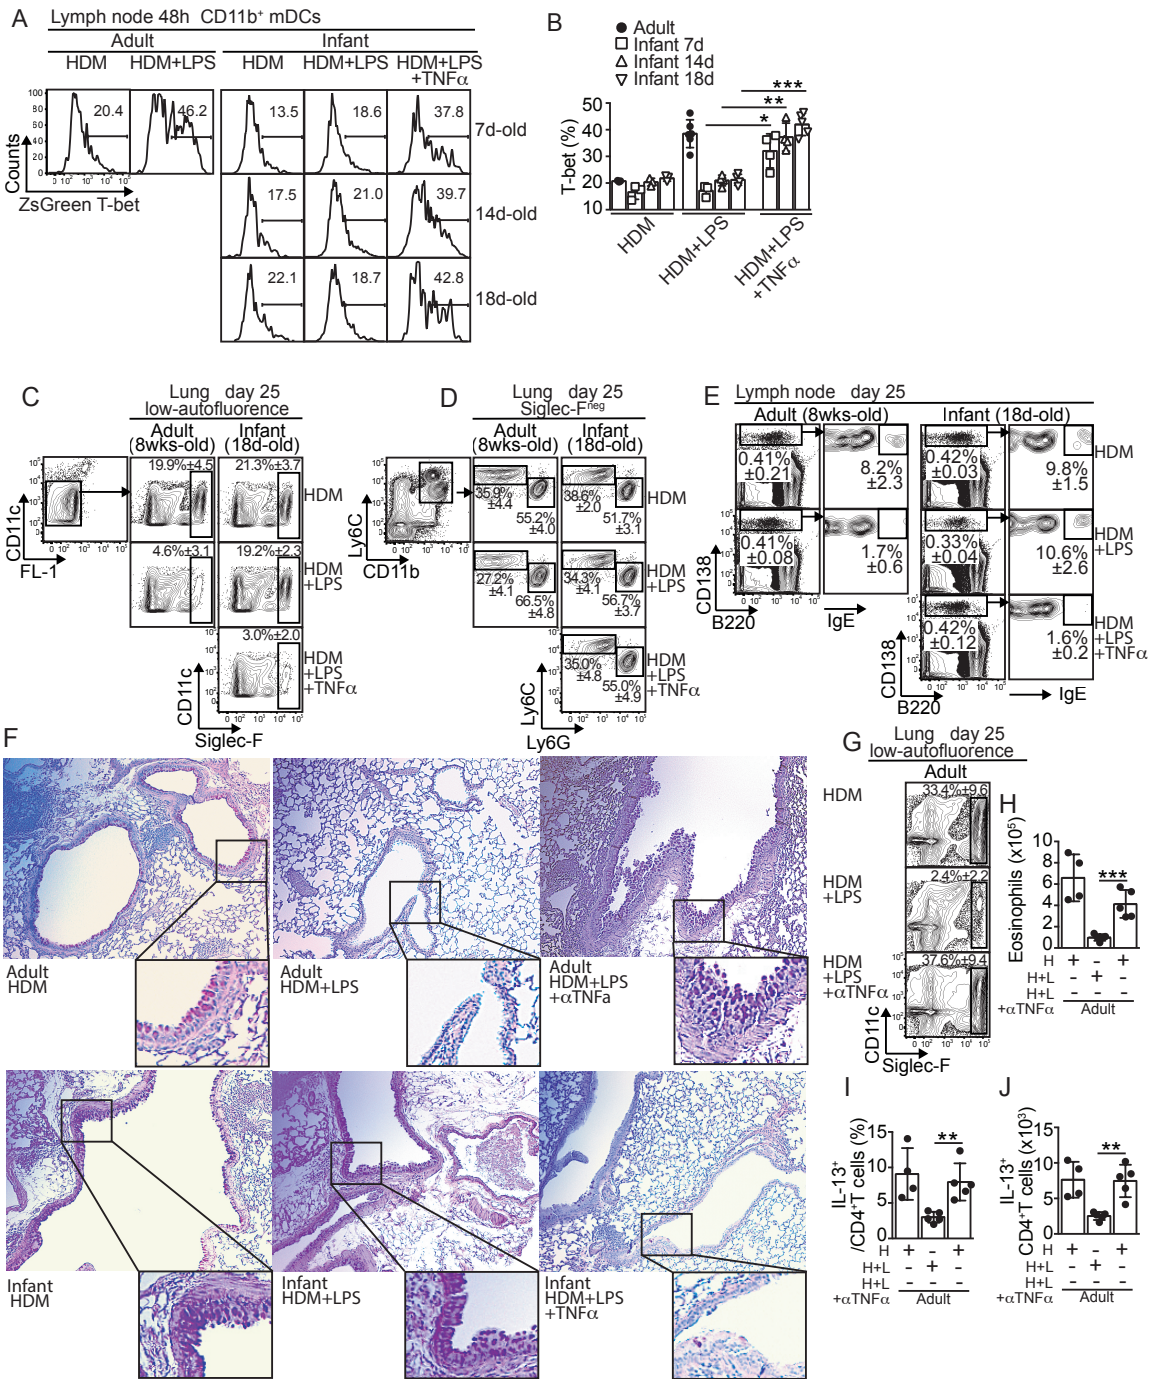

**Figure S7. Related to Figure 7. Asthma features in the presence and absence of TNF- $\alpha$ .** (A-B) T-bet-Zs-Green reporter adults, 7d-old neonates, 14d-old infants and 18d-old infants were i.n treated with HDM+/-5 $\mu$ g of LPS+/-30ng of TNF- $\alpha$ . Frequencies of T-bet-expressing (ZsG+) mLN CD11b<sup>+</sup> mDCs on day2. (C-J) B6 adult and 18d-old infant mice were i.n treated with HDM+/-5 $\mu$ g of LPS+/-30 $\mu$ g of TNF- $\alpha$ . Some adult mice also receive 250 $\mu$ g of anti-TNF $\alpha$  (i.p.). On day 20, mice were i.n challenged with HDM and analyzed on day 25. Frequencies of eosinophils (autofluorescence CD11c<sup>lo</sup> Siglec-F<sup>+</sup>) (C, G), neutrophils (Siglec-F<sup>neg</sup> CD11b<sup>hi</sup> Ly6C<sup>int</sup>) and monocytes (Siglec-F<sup>neg</sup> CD11b<sup>hi</sup> Ly6C<sup>hi</sup>) (D) and numbers of eosinophils (H) in the lungs. Frequencies of IgE<sup>+</sup> ACS (E) in the mLN. Lung sections stained with PAS to identify goblet cells (F). Frequencies (I) and numbers (J) of IL-13-expressing CD4<sup>+</sup> T cells in the lungs determined by ICS after restimulation for 4 h. \*P < 0.05 \*\*P < 0.01 \*\*\*P < 0.001 (unpaired Student's t test). Data are representative of two independent experiments (mean and S.D. of 3-5 mice per group).
